# Supplementary material for: Equine Herpesvirus Type 1 Modulates Cytokine and Chemokine Profiles of Mononuclear Cells for Efficient Dissemination to Target Organs
Source: PubMed Central journal article supplement (PMC7551999; doi:10.3390/v12090999), 2020-09-08
Supplement: viruses-12-00999-s001.pdf [file viruses-12-00999-s001.pdf]

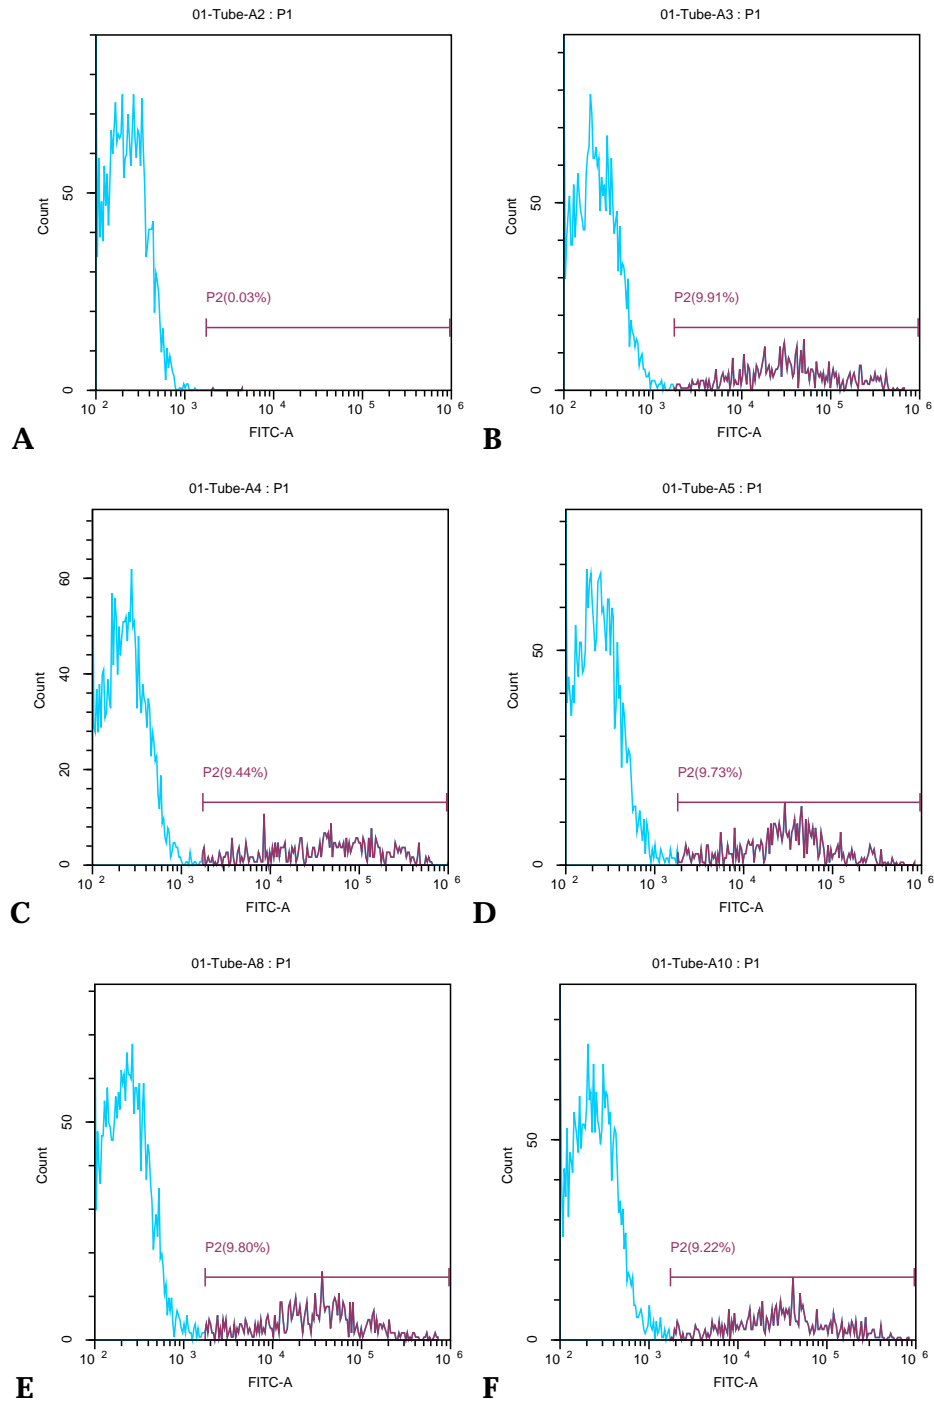

**Supplementary figure S1: Rate of infection of PBMC with Ab4-wt and mutant viruses.** PBMC were infected with Ab4-wt or mutant viruses at an MOI of 0.1 for 24 h. Infected PBMC were sorted based on *egfp* expression using FACS Aria (BD Bioscience) and used for transwell co-cultivation and flow chamber experiments. (A) mock infected (B) Ab4-wt, (C) Ab4 $\Delta$ ORF1 (D) Ab4 $\Delta$ ORF2 (E) Ab4 $\Delta$ ORF17) and (F) Ab4 $\Delta$ /ORF1/ORF2/ORF17 infected PBMC at 24 hrs post infection. P2 indicates percentage of *egfp* positive PBMC. (n=4)

| Infected population  | Pathways upregulated                        |                                                                                                                                                                                 | Pathways downregulated             |                                                                                                                                                                                                                              |
|----------------------|---------------------------------------------|---------------------------------------------------------------------------------------------------------------------------------------------------------------------------------|------------------------------------|------------------------------------------------------------------------------------------------------------------------------------------------------------------------------------------------------------------------------|
|                      | Pathways                                    | Genes                                                                                                                                                                           | Pathways                           | Genes                                                                                                                                                                                                                        |
| PBMC<br>Vs<br>Ab4-wt | <b>Lysosome</b>                             | ATPase H+ transporting V0 subunit d1<br>Adaptor related protein complex 3 mu 1 subunit<br>Adaptor related protein complex 3 mu 2 subunit<br>Scavenger receptor class B member 2 | <b>Herpesvirus infection</b>       | CD58 molecule<br>Proteasome 26S subunit, non-ATPase 2<br>recombination signal binding protein for immunoglobulin kappa J region like<br>recombination signal binding protein for immunoglobulin kappa J region               |
|                      | <b>Ras signaling pathway</b>                | RAP1A, member of RAS oncogene family<br>Phosphoinositide-3-kinase regulatory subunit 1<br>Ras-related protein Rap-1A                                                            |                                    |                                                                                                                                                                                                                              |
|                      | <b>Endocytosis</b>                          | EH domain containing 1<br>EH domain containing 3<br>RAB35, member RAS oncogene family<br>RAB5A, member RAS oncogene family                                                      | <b>Spliceosome</b>                 | LSM6 homolog, U6 small nuclear RNA and mRNA degradation associated<br>RNA binding motif protein 22<br>Cell division cycle 40                                                                                                 |
|                      | <b>Platelet activation</b>                  | RAP1A, member of RAS oncogene family<br>Phosphoinositide-3-kinase regulatory subunit 1                                                                                          |                                    | Squamous cell carcinoma antigen recognized by T-cells 1                                                                                                                                                                      |
|                      | <b>Leukocyte transendothelial migration</b> | Ras-related protein Rap-1A                                                                                                                                                      | <b>Chemokine signaling pathway</b> | RAP1A, member of RAS oncogene family<br>Mitogen-activated protein kinase kinase 1                                                                                                                                            |
|                      | <b>Oxidative phosphorylation</b>            | ATP synthase, H+ transporting, mitochondrial F1 complex, alpha subunit 1<br>ATPase H+ transporting V0 subunit d1<br>NADH:ubiquinone oxidoreductase core subunit V1              | <b>RNA degradation</b>             | Stress induced phosphoprotein 1<br>TNFRSF1A associated via death domain<br>Chromodomain helicase DNA binding protein 4<br>LSM6 homolog, U6 small nuclear RNA and mRNA degradation associated<br>RNA binding motif protein 22 |
|                      | <b>Fatty acid elongation</b>                | Hydroxysteroid 17-beta dehydrogenase 12<br>Mitochondrial trans-2-enoyl-CoA reductase                                                                                            | <b>Apoptosis</b>                   | Apoptosis inducing factor, mitochondria associated 1<br>Caspase 1, apoptosis-related cysteine peptidase<br>Caspase 10<br>MALT1 paracaspase                                                                                   |
|                      | <b>Herpesvirus infection</b>                | CD58 molecule<br>TNFRSF1A associated via death domain<br>Proteasome 26S subunit, non-ATPase 12                                                                                  | <b>Chemokine signaling pathway</b> | RAP1A, member of RAS oncogene family<br>Mitogen-activated protein kinase kinase 1<br>Ras-related protein Rap-1A                                                                                                              |

**PBMC**  
**Vs**  
**Ab4ΔORF17**

|  |                                                                                |                                                                                                                                                                                                                                                                                                                                                                                                                                                                                                                              |                               |                                                                                                                                                                                                                        |
|--|--------------------------------------------------------------------------------|------------------------------------------------------------------------------------------------------------------------------------------------------------------------------------------------------------------------------------------------------------------------------------------------------------------------------------------------------------------------------------------------------------------------------------------------------------------------------------------------------------------------------|-------------------------------|------------------------------------------------------------------------------------------------------------------------------------------------------------------------------------------------------------------------|
|  |                                                                                | Recombination signal binding protein for immunoglobulin kappa J region like<br>Recombination signal binding protein for immunoglobulin kappa J region 1                                                                                                                                                                                                                                                                                                                                                                      |                               | Stress induced phosphoprotein 1                                                                                                                                                                                        |
|  | <b>Lysosome</b>                                                                | ATPase H+ transporting V0 subunit d1<br>Adaptor related protein complex 3 mu 1 subunit<br>Adaptor related protein complex 3 mu 2 subunit<br>Scavenger receptor class B member 2                                                                                                                                                                                                                                                                                                                                              | <b>MAPK signaling pathway</b> | Protein phosphatase 5 catalytic subunit<br>RAP1A, member of RAS oncogene family<br>Mitogen-activated protein kinase kinase 1<br>Ras-related protein Rap-1A                                                             |
|  | <b>Oxidative phosphorylation</b>                                               | ATP synthase, H+ transporting, mitochondrial F1 complex, alpha subunit 1<br>ATPase H+ transporting V0 subunit d1<br>NADH:ubiquinone oxidoreductase core subunit V1                                                                                                                                                                                                                                                                                                                                                           | <b>RNA transport</b>          | RNA binding motif protein 22<br>Pre-mRNA processing factor 3<br>NOP2/Sun RNA methyltransferase family member 2                                                                                                         |
|  | <b>Protein processing in endoplasmic reticulum and Fc epsilon RI signaling</b> | ER membrane protein complex subunit 1<br>Endoplasmic reticulum lectin 1<br>Serine/threonine-protein phosphatase 6 catalytic subunit<br>Receptor-type tyrosine-protein phosphatase epsilon                                                                                                                                                                                                                                                                                                                                    | <b>Spliceosome</b>            | Ribosomal RNA processing 1B<br>LSM6 homolog, U6 small nuclear RNA and mRNA degradation associated<br>RNA binding motif protein 22<br>Cell division cycle 40<br>Squamous cell carcinoma antigen recognized by T-cells 1 |
|  | <b>Metabolic pathways</b>                                                      | 24-dehydrocholesterol reductase<br>T-cell immune regulator 1, ATPase H+ transporting V0 subunit a3<br>Acetyl-CoA acetyltransferase 2<br>Acyl-CoA synthetase long-chain family member 3<br>Adenosylhomocysteinase like 1<br>Adenosylhomocysteinase like 2<br>Branched chain amino acid transaminase 2<br>Ceramide synthase 2<br>Inositol polyphosphate-1-phosphatase<br>Methylcrotonoyl-CoA carboxylase 1<br>Methylcrotonoyl-CoA carboxylase 2<br>Phosphatidylinositol glycan anchor biosynthesis class U<br>Phospholipase B1 |                               |                                                                                                                                                                                                                        |

Pyruvate dehydrogenase complex component

|                                 |                                                                     |                                                                                                                                                                                             |                                    |                                                                                                                                                                                                                                                                                                                                                                      |
|---------------------------------|---------------------------------------------------------------------|---------------------------------------------------------------------------------------------------------------------------------------------------------------------------------------------|------------------------------------|----------------------------------------------------------------------------------------------------------------------------------------------------------------------------------------------------------------------------------------------------------------------------------------------------------------------------------------------------------------------|
| <b>PBMC<br/>Vs<br/>Ab4ΔORF1</b> | <b>mTOR signaling pathway</b>                                       | 3-phosphoinositide dependent protein kinase 1<br>Ras related GTP binding C<br>Ras related GTP binding D<br>Phosphatidylinositol-4,5-bisphosphate 3-kinase catalytic subunit gamma           | <b>Metabolic pathways</b>          | ATP synthase, H <sup>+</sup> transporting, mitochondrial F1 complex, epsilon subunit (ATP5E)<br>ATPase H <sup>+</sup> transporting V0 subunit a1<br>NADH:ubiquinone oxidoreductase core subunit V1<br>Aconitase 1<br>Fucokinase<br>Galactosidase beta 1<br>Hydroxysteroid 17-beta dehydrogenase 12<br>Mannosidase alpha class 2A member 1<br>Thymidine phosphorylase |
|                                 | <b>Herpesvirus infection</b>                                        | CD58 molecule<br>Phosphatidylinositol-4,5-bisphosphate 3-kinase catalytic subunit gamma<br>Proteasome 26S subunit, non-ATPase 12                                                            |                                    |                                                                                                                                                                                                                                                                                                                                                                      |
|                                 | <b>Lysosome</b>                                                     | ATPase H <sup>+</sup> transporting V0 subunit d1<br>Adaptor related protein complex 3 mu 1 subunit<br>Adaptor related protein complex 3 mu 2 subunit<br>Scavenger receptor class B member 2 |                                    |                                                                                                                                                                                                                                                                                                                                                                      |
|                                 | <b>Chemokine signaling pathway</b>                                  | RAP1A, member of RAS oncogene family<br>Mitogen-activated protein kinase kinase 1<br>Ras-related protein Rap-1A<br>Stress induced phosphoprotein 1                                          | <b>Spliceosome</b>                 | LSM6 homolog, U6 small nuclear RNA and mRNA degradation associated<br>RNA binding motif protein 22<br>Cell division cycle 40<br>Squamous cell carcinoma antigen recognized by T-cells 1                                                                                                                                                                              |
|                                 | <b>Platelet activation<br/>Leukocyte transendothelial migration</b> | RAP1A, member of RAS oncogene family<br>Phosphoinositide-3-kinase regulatory subunit 1<br>Ras-related protein Rap-1A<br>CD58 molecule                                                       | <b>RNA degradation</b>             | TNFRSF1A associated via death domain<br>Chromodomain helicase DNA binding protein 4<br>LSM6 homolog, U6 small nuclear RNA and mRNA degradation associated<br>RNA binding motif protein 22                                                                                                                                                                            |
|                                 | <b>Focal adhesion and Ras signaling pathway</b>                     | RAP1A, member of RAS oncogene family<br>Phosphoinositide-3-kinase regulatory subunit 1<br>Ras-related protein Rap-1A                                                                        | <b>Aminoacyl-tRNA biosynthesis</b> | Histidyl-tRNA synthetase 2, mitochondrial<br>Histidyl-tRNA synthetase<br>phenylalanyl-tRNA synthetase beta subunit                                                                                                                                                                                                                                                   |
|                                 | <b>Endocytosis</b>                                                  | EH domain containing 1<br>EH domain containing 3<br>RAB35, member RAS oncogene family                                                                                                       |                                    |                                                                                                                                                                                                                                                                                                                                                                      |

|                        |                                         |                                                                                                                                                                                                                                                      |                               |                                                                                                                                                                                           |
|------------------------|-----------------------------------------|------------------------------------------------------------------------------------------------------------------------------------------------------------------------------------------------------------------------------------------------------|-------------------------------|-------------------------------------------------------------------------------------------------------------------------------------------------------------------------------------------|
| PBMC<br>Vs<br>Ab4ΔORF2 | <b>Herpesvirus infection</b>            | CD58 molecule<br>proteasome 26S subunit, non-ATPase 12<br>proteasome 26S subunit, non-ATPase 2                                                                                                                                                       | <b>Spliceosome</b>            | LSM6 homolog, U6 small nuclear RNA and mRNA degradation associated<br>RNA binding motif protein 22<br>Cell division cycle 40<br>Squamous cell carcinoma antigen recognized by T-cells 1   |
|                        | <b>mTOR signaling</b>                   | 3-phosphoinositide dependent protein kinase 1<br>Ras related GTP binding C<br>Ras related GTP binding D<br>Phosphatidylinositol-4,5-bisphosphate 3-kinase catalytic subunit gamma                                                                    |                               |                                                                                                                                                                                           |
|                        | <b>Regulation of actin cytoskeleton</b> | FYVE, RhoGEF and PH domain containing 3<br>Integrin subunit beta<br>Phosphatidylinositol-4,5-bisphosphate 3-kinase catalytic subunit gamma<br>Phosphatidylinositol-5-phosphate 4-kinase type 2 gamma<br>Protein phosphatase 1 regulatory subunit 12A | <b>RNA degradation</b>        | TNFRSF1A associated via death domain<br>Chromodomain helicase DNA binding protein 4<br>LSM6 homolog, U6 small nuclear RNA and mRNA degradation associated<br>RNA binding motif protein 22 |
|                        | <b>Chemokine signaling pathway</b>      | RAP1A, member of RAS oncogene family<br>Mitogen-activated protein kinase kinase 1<br>Ras-related protein Rap-1A<br>Stress induced phosphoprotein 1                                                                                                   | <b>MAPK signaling pathway</b> | RAP1A, member of RAS oncogene family<br>Interleukin 1 alpha<br>Protein phosphatase 5 catalytic subunit<br>Ras-related protein Rap-1A<br>Ribosomal protein S6 kinase A5                    |
| PBMC<br>Vs             | <b>Endocytosis</b>                      | EH domain containing 1<br>EH domain containing 3<br>RAB35, member RAS oncogene family<br>RAB5A, member RAS oncogene family                                                                                                                           | <b>Spliceosome</b>            | LSM6 homolog, U6 small nuclear RNA and mRNA degradation associated<br>RNA binding motif protein 22<br>Cell division cycle 40<br>Squamous cell carcinoma antigen recognized by T-cells 1   |
|                        | <b>Herpesvirus infection</b>            | CD58 molecule<br>proteasome 26S subunit, non-ATPase 12<br>proteasome 26S subunit, non-ATPase 2                                                                                                                                                       |                               |                                                                                                                                                                                           |
|                        | <b>Lysosome</b>                         | ATPase H <sup>+</sup> transporting V0 subunit d1<br>Adaptor related protein complex 3 mu 1 subunit<br>Adaptor related protein complex 3 mu 2 subunit<br>Scavenger receptor class B member 2                                                          | <b>MAPK signaling pathway</b> | RAP1A, member of RAS oncogene family<br>Interleukin 1 alpha<br>Protein phosphatase 5 catalytic subunit<br>Ras-related protein Rap-1A<br>Ribosomal protein S6 kinase A5                    |

Ab4ΔORF1/  
ORF2/ORF17

**Chemokine  
signaling  
pathway**

**T cell signaling**

RAP1A, member of RAS oncogene family  
Mitogen-activated protein kinase kinase 1  
Ras-related protein Rap-1A  
Stress induced phosphoprotein 1  
T-cell immune regulator 1, ATPase H+  
transporting V0 subunit a3  
Squamous cell carcinoma antigen recognized  
by T-cells 1  
Phosphatidylinositol-4,5-bisphosphate 3-  
kinase catalytic subunit gamma  
Phosphatidylinositol-5-phosphate 4-kinase  
type 2 gamma

**RNA  
degradation**

TNFRSF1A associated via death domain  
Chromodomain helicase DNA binding protein 4  
LSM6 homolog, U6 small nuclear RNA and  
mRNA degradation associated  
RNA binding motif protein 22

---

**Supplementary Table S1: Complete list of proteins differentially regulated in corresponding pathways in Ab4-wt and mutant viruses infected PBMC.** PBMC were infected with Ab4-wt and mutants at MOI of 1. At 24 hpi, infected PBMC were sorted and proteomic analysis was performed. Pathways significantly upregulated and downregulated (based on *p*-value and Benjamini-corrected modified Fisher's exact test value) in infected PBMC in comparison healthy PBMC were given (n=4).

| <b>S. No</b> | <b>Uniprot ID</b> | <b>Protein names</b>                                       | <b>Gene/ORF</b> | <b>Function</b>                                                                                                                                                                                                                                                                                                                    | <b>Subcellular location</b>                                                |
|--------------|-------------------|------------------------------------------------------------|-----------------|------------------------------------------------------------------------------------------------------------------------------------------------------------------------------------------------------------------------------------------------------------------------------------------------------------------------------------|----------------------------------------------------------------------------|
| 1            | P28846            | Ribonucleoside-diphosphate reductase large subunit (R1)    | RIR1/ORF21      | Precursors necessary for viral DNA synthesis. Allows virus growth in non-dividing cells                                                                                                                                                                                                                                            | Host membrane                                                              |
| 2            | P28847            | Ribonucleoside-diphosphate reductase small subunit (R2)    | RIR2/ORF20      | Precursors necessary for viral DNA synthesis. Allows virus growth in non-dividing cells                                                                                                                                                                                                                                            | Host membrane                                                              |
| 3            | P28858            | DNA polymerase catalytic subunit                           | ORF30           | Replicates viral genomic DNA                                                                                                                                                                                                                                                                                                       | Host nucleus, replication compartments where viral DNA replication occurs. |
| 4            | P28866            | Uracil-DNA glycosylase (UDG)                               | ORF61           | Excises uracil residues from the DNA. Reduce deleterious uracil incorporation into the viral genome, in terminally differentiated cells which lack DNA repair enzymes.                                                                                                                                                             | Host nucleus                                                               |
| 5            | P28892            | Deoxyuridine 5'-triphosphate nucleotidohydrolase (dUTPase) | DUT / ORF9      | Nucleotide metabolism: decreases the intracellular concentration of dUTP to avoid uracil incorporation into viral DANN                                                                                                                                                                                                             |                                                                            |
| 6            | P28919            | Alkaline nuclease                                          | ORF50           | Role in processing non linear or branched viral DNA intermediates to promote the production of mature packaged unit-length linear progeny viral DNA molecules. Exhibits endonuclease and exonuclease activities                                                                                                                    | Host nucleus, cytoplasm                                                    |
| 7            | P28920            | Major capsid protein                                       | ORF42           | Self-assembles to form an icosahedral capsid with a T=16 symmetry                                                                                                                                                                                                                                                                  | Virion, Host nucleus                                                       |
| 8            | P28921            | Triplex capsid protein 2                                   | TRX2/ORF43      | Structural component of the T=16 icosahedral capsid.                                                                                                                                                                                                                                                                               | Virion, Host nucleus                                                       |
| 9            | P28925            | Major viral transcription factor                           | ORF64           | This IE protein is a multifunctional protein capable of migrating to the nucleus, binding to DNA, trans-activating other viral genes, and autoregulating its own synthesis.                                                                                                                                                        | Host nucleus                                                               |
| 10           | P28926            | Serine/threonine-protein kinase US3 homolog                | ORF69           | Multifunctional serine/threonine kinase, role in egress of virus particles from the nucleus, modulation of the actin cytoskeleton and inhibition of apoptosis.                                                                                                                                                                     | Host cytoplasm, Host nucleus                                               |
| 11           | P28928            | Capsid vertex component 2                                  | CVC2/ORF36      | Capsid vertex-specific component that plays a role during viral DNA encapsidation, assuring correct genome cleavage and presumably stabilizing capsids that contain full-length viral genomes.                                                                                                                                     | Virion, Host nucleus                                                       |
| 12           | P28929            | Tegument protein UL47 homolog (GP10)                       | ORF13           | Tegument protein that can bind to various RNA transcripts. Role in the attenuation of selective viral and cellular mRNA degradation by modulating the activity of host shutoff RNase UL41/VHS. Role in the primary envelopment of virions in the perinuclear space, by interacting with two nuclear egress proteins UL31 and UL34. | Virion tegument, Host nucleus, cytoplasm                                   |

|    |        |                                                                           |                |                                                                                                                                                                                                                                                                                                                                                                                                                                                                                        |                                                             |
|----|--------|---------------------------------------------------------------------------|----------------|----------------------------------------------------------------------------------------------------------------------------------------------------------------------------------------------------------------------------------------------------------------------------------------------------------------------------------------------------------------------------------------------------------------------------------------------------------------------------------------|-------------------------------------------------------------|
| 13 | P28932 | Major DNA-binding protein (DBP)                                           | ORF31          | Crucial roles in viral infection. Participates in the opening of the viral DNA origin to initiate replication by interacting with the origin-binding protein                                                                                                                                                                                                                                                                                                                           | Host nucleus                                                |
| 14 | P28935 | Triplex capsid protein 1                                                  | TRX1/<br>ORF22 | Structural component of the T=16 icosahedral capsid                                                                                                                                                                                                                                                                                                                                                                                                                                    | Virion, Host nucleus                                        |
| 15 | P28937 | Tegument protein UL46 homolog                                             | ORF14          | Modulates alpha trans-inducing factor-dependent activation of alpha genes                                                                                                                                                                                                                                                                                                                                                                                                              | Virion tegument, Host cell membrane                         |
| 16 | P28938 | Tegument protein VP16 homolog (Alpha trans-inducing protein)              | ORF12          | Transcriptional activator of immediate-early (IE) gene products. Key activator of lytic infection by initiating the lytic program through the assembly of the transcriptional regulatory VP16-induced complex composed of VP16 and two cellular factors, HCFC1 and POU2F1. VP16-induced complex represents a regulatory switch: when it is on, it promotes IE-gene expression and thus lytic infection, and when it is off, it limits IE-gene transcription favoring latent infection. | Virion tegument, Host nucleus                               |
| 17 | P28939 | mRNA export factor ICP27 homolog (Transcriptional regulator IE63 homolog) | ORF5           | Multifunctional regulator of the expression of viral genes that mediates nuclear export of viral intronless mRNAs. This immediate early (EI) protein promotes the nuclear export of viral intronless mRNAs by interacting with mRNAs and host NXF1/TAP                                                                                                                                                                                                                                 | Host cytoplasm, nucleus                                     |
| 18 | P28944 | Portal protein                                                            | ORF56          | Forms a portal in the viral capsid through which viral DNA is translocated during DNA packaging. Assembles as a dodecamer at a single fivefold axis of the T=16 icosahedral capsid. Binds to the molecular motor that translocates the viral DNA, termed terminase.                                                                                                                                                                                                                    | Virion, Host nucleus                                        |
| 19 | P28950 | Capsid vertex component 1                                                 | CVC1/<br>ORF45 | Role during viral DNA encapsidation, assuring correct genome cleavage and presumably stabilizing capsids that contain full-length viral genomes                                                                                                                                                                                                                                                                                                                                        | Virion, Host nucleus                                        |
| 20 | P28951 | Nuclear egress protein 1                                                  | NEC1/<br>ORF29 | Essential role in virion nuclear egress, the first step of virion release from infected cell                                                                                                                                                                                                                                                                                                                                                                                           | Host nucleus inner membrane through interaction with NEC2   |
| 21 | P28954 | Nuclear egress protein 2                                                  | NEC2/<br>ORF26 | Essential role in virion nuclear egress, the first step of virion release from infected cell                                                                                                                                                                                                                                                                                                                                                                                           | Host nucleus inner membrane                                 |
| 22 | P28955 | Large tegument protein denedylase                                         | ORF24          | Large tegument protein that plays multiple roles in the viral cycle                                                                                                                                                                                                                                                                                                                                                                                                                    | Virion tegument, cytoplasm, nucleus. Associated with capsid |
| 23 | P28956 | Inner tegument protein                                                    | ORF23          | Essential role in cytoplasmic secondary envelopment during viral egress.                                                                                                                                                                                                                                                                                                                                                                                                               | Virion tegument, cytoplasm, nucleus, golgi apparatus        |
| 24 | P28958 | DNA-binding Polymerase accessory protein                                  | ORF18          | Essential role in viral DNA replication by acting as the polymerase accessory subunit                                                                                                                                                                                                                                                                                                                                                                                                  | Host nucleus                                                |



|    |        |                                              |              |                                                                                                                                                                                                                                                                                                                                                                                                                                                                                                                                                                                                                                                            |                                                           |
|----|--------|----------------------------------------------|--------------|------------------------------------------------------------------------------------------------------------------------------------------------------------------------------------------------------------------------------------------------------------------------------------------------------------------------------------------------------------------------------------------------------------------------------------------------------------------------------------------------------------------------------------------------------------------------------------------------------------------------------------------------------------|-----------------------------------------------------------|
| 25 | P28960 | Tegument protein VP22                        | ORF11        | Tegument protein that plays different roles during the time course of infection. Participates in both the accumulation of viral mRNAs and viral protein translation at late time of infection. Most abundant tegument protein (2000 copies per virion).                                                                                                                                                                                                                                                                                                                                                                                                    | Virion tegument, Host cytoplasm, nucleus, Golgi apparatus |
| 26 | P28962 | DNA primase                                  | ORF7         | Essential component of the helicase/primase complex. Unwinds the DNA at the replication forks and generates single-stranded DNA for both leading and lagging strand synthesis                                                                                                                                                                                                                                                                                                                                                                                                                                                                              | Host nucleus                                              |
| 27 | P28966 | Serine/threonine-protein kinase UL13 homolog | ORF49        | Multifunctional serine/threonine kinase, role in egress of virus particles from the nucleus, modulation of the actin cytoskeleton and regulation of viral and cellular gene expression. Regulates the nuclear localization of viral envelopment factors UL34 and UL31 homologs, by phosphorylating the US3 kinase homolog, indicating a role in nuclear egress. Disrupts host nuclear lamins, including LMNA and LMNB1. Phosphorylates the viral Fc receptor composed of glycoproteins E (gE) and I (gI). Phosphorylation of glycoprotein E (gE) by UL13 homolog alters its subcellular localization, from the host early endosome to the plasma membrane. | Virion tegument, Host nucleus                             |
| 28 | P28967 | Envelope glycoprotein G (gG)                 | gG/<br>ORF70 | Chemokine-binding protein that inhibits neutrophils' chemotaxis.                                                                                                                                                                                                                                                                                                                                                                                                                                                                                                                                                                                           | Virion membrane, Single-pass membrane protein             |
| 29 | P28970 | Cytoplasmic envelopment protein 2            | ORF46        | Plays a critical role in cytoplasmic virus egress. Participates in the final step of tegumentation and envelope acquisition within the host cytoplasm by directly interacting with the capsid. Upon virion binding to target cell, a signaling cascade is triggered to disrupt the interaction with the capsid, thereby preparing capsid uncoating.                                                                                                                                                                                                                                                                                                        | Virion tegument, Host cytoplasm, nucleus                  |
| 30 | P28972 | Tegument protein UL21 homolog                | ORF40        | May participate in DNA packaging/capsid maturation events. Promotes efficient incorporation of tegument proteins UL46, UL49, and US3 homologs into virions. May also play a role in capsid transport to the trans-Golgi network (TGN) (By similarity).                                                                                                                                                                                                                                                                                                                                                                                                     | Virion tegument, Host cytoplasm, nucleus                  |
| 31 | P28979 | Gene 2 protein                               | ORF2         | Immunomodulatory protein                                                                                                                                                                                                                                                                                                                                                                                                                                                                                                                                                                                                                                   |                                                           |
| 32 | P28981 | Envelope protein UL45 homolog                | ORF15        | Uncharacterized                                                                                                                                                                                                                                                                                                                                                                                                                                                                                                                                                                                                                                            | Virion membrane, Single-pass type II membrane protein     |
| 33 | P28983 | Uncharacterized gene 59 protein              | ORF59        | Uncharacterized                                                                                                                                                                                                                                                                                                                                                                                                                                                                                                                                                                                                                                            |                                                           |
| 34 | P28988 | Gene 3 protein                               | ORF3         | Uncharacterized                                                                                                                                                                                                                                                                                                                                                                                                                                                                                                                                                                                                                                            |                                                           |
| 35 | P28990 | E3 ubiquitin-protein ligase ICP0             | ORF63        | Evades nuclear antiviral defenses triggered by dsDNA viruses. Acts during the initial stages of lytic infection and the reactivation of latent viral genome. Prevents the antiviral effect of nuclear bodies by degrading host PML and SP100                                                                                                                                                                                                                                                                                                                                                                                                               |                                                           |
| 36 | P69185 | Thymidine kinase                             | TK/<br>ORF38 | Catalyzes the transfer of the gamma-phospho group of ATP to thymidine to generate dTMP in the salvage pathway of pyrimidine synthesis. The dTMP - substrate for DNA polymerase in viral DNA replication. Allows virus to be reactivated and to grow in non-proliferative cells lacking a high concentration of phosphorylated nucleic acid precursors.                                                                                                                                                                                                                                                                                                     |                                                           |
| 37 | P69329 | Packaging protein UL32 homolog               | ORF28        | Role in efficient localization of neo-synthesized capsids to nuclear replication compartments, thereby controlling cleavage and packaging of virus genomic DNA.                                                                                                                                                                                                                                                                                                                                                                                                                                                                                            | Host cytoplasm, nucleus                                   |

|    |        |                                                   |                      |                                                                                                                                                                                                                                                                                                                                                                                                                             |                                                                                                                                        |
|----|--------|---------------------------------------------------|----------------------|-----------------------------------------------------------------------------------------------------------------------------------------------------------------------------------------------------------------------------------------------------------------------------------------------------------------------------------------------------------------------------------------------------------------------------|----------------------------------------------------------------------------------------------------------------------------------------|
| 38 | Q6DLD8 | Envelope glycoprotein I (gI)                      | gI/<br>ORF73         | In epithelial cells, the heterodimer gE/gI is required for the cell-to-cell spread of the virus, by sorting nascent virions to cell junctions                                                                                                                                                                                                                                                                               | Virion membrane, Host cell membrane, cell junction, Golgi apparatus membrane                                                           |
| 39 | Q6DLD9 | Envelope glycoprotein D (gD) (Glycoprotein 17/18) | gD/<br>ORF72         | Envelope glycoprotein that binds to host cell entry receptors. May trigger fusion with host membrane, by recruiting the fusion machinery composed of gB and gH/gL                                                                                                                                                                                                                                                           | Virion membrane, endosomes and trans-Golgi                                                                                             |
| 40 | Q6DLH1 | Envelope glycoprotein H (gH)                      | gH/<br>ORF39         | The heterodimer glycoprotein H-glycoprotein L is required for the fusion of viral and plasma membranes leading to virus entry into the host cell.                                                                                                                                                                                                                                                                           | Virion membrane, Host cell membrane, endosome membrane                                                                                 |
| 41 | Q6DLH8 | Envelope glycoprotein B (gB)                      | gB/<br>ORF33         | Envelope glycoprotein that forms spikes at the surface of virion envelope                                                                                                                                                                                                                                                                                                                                                   | Virion membrane, Host cell membrane, endosome membrane, Golgi                                                                          |
| 42 | Q6DLH9 | Tripartite terminase subunit 1                    | TRM1/<br>ORF32       | Component of the molecular motor that translocates viral genomic DNA in empty capsid during DNA packaging. Forms a tripartite terminase complex with TRM2 and TRM3 in the cytoplasm. The complex reaches the host nucleus and interacts with capsid portal vertex. This portal forms a ring in which genomic DNA is translocated into the capsid. Role for the cleavage of concatemeric viral DNA into unit length genomes. | Host nucleus. Seen external surface of the viral capsid during assembly and DNA packaging, but absent in extracellular mature virions. |
| 43 | Q6LAQ8 | Uncharacterized gene 67 protein (IR6 protein)     | IR6/<br>ORF67        | Determinant of EHV-1 virulence and play role in virus maturation and/or egress                                                                                                                                                                                                                                                                                                                                              | Host cytoplasm                                                                                                                         |
| 44 | Q6S6Q5 | Envelope glycoprotein C (gC) (Glycoprotein 13)    | gC<br>GP13/<br>ORF16 | Essential for the initial attachment to heparan sulfate moities of the host cell surface proteoglycans. Plays also a role in host immune evasion by inhibiting the host complement cascade activation                                                                                                                                                                                                                       | Virion membrane                                                                                                                        |
| 46 | Q6S6V7 | Envelope glycoprotein E (gE)                      | gE<br>ORF/74         | In epithelial cells, the heterodimer gE/gI is required for the cell-to-cell spread of the virus, by sorting nascent virions to cell junctions                                                                                                                                                                                                                                                                               | Virion membrane, Host cell membrane, cell junction, Golgi, endosome membrane                                                           |

**Supplementary Table S2: Function and subcellular localization Ab4-viral proteins quantified in infected PBMC.** PBMC were infected with Ab4-wt and mutant viruses, and proteomic analysis was performed at 24 hpi. (n=4). Data regarding function of viral proteins were from uniprot database.

| S. No: | Viral protein Name                   | LFQ intensity |          |                     |                     |                     |                            |
|--------|--------------------------------------|---------------|----------|---------------------|---------------------|---------------------|----------------------------|
|        |                                      | ORF           | EHV-1 WT | EHV-1 $\Delta$ UL43 | EHV-1 $\Delta$ ORF1 | EHV-1 $\Delta$ ORF2 | EHV-1 $\Delta$ UL43/ORF1/2 |
| 1      | Ribonucleoside-diphosphate reductase | 21            | 38457000 | 42760000            | 28937000            | 34619000            | 31547000                   |
| 2      | Ribonucleoside-diphosphate reductase | 20            | 5598100  | 5476500             | 5585500             | 5649700             | 6021400                    |
| 3      | DNA polymerase                       | 30            | 2382500  | 3150200             | 3580700             | 3538800             | 3046200                    |
| 4      | Uracil-DNA glycosylase               | 61            | 5891500  | 5534200             | 8313800             | 7703800             | 6132800                    |
| 5      | Deoxyuridine 5-triphosphate          | 9             | 2214900  | 1760400             | 2349300             | 2203100             | 2709400                    |
| 6      | Alkaline nuclease                    | 50            | 13880000 | 15983000            | 13770000            | 15895000            | 15346000                   |
| 7      | Major capsid protein                 | 42            | 5.59E+08 | 7.13E+08            | 4.05E+08            | 3.15E+08            | 4.34E+08                   |
| 8      | Triplex capsid protein 2             | 43            | 62978000 | 95072000            | 60136000            | 87828000            | 64373000                   |
| 9      | Major viral transcription factor     | 64            | 3.25E+08 | 82903000            | 6.86E+08            | 5.72E+08            | 82162000                   |
| 10     | Serine/threonine-protein kinase      | 69            | 30570000 | 40562000            | 42719000            | 37277000            | 32926000                   |
| 11     | Capsid vertex component              | 36            | 9458300  | 10320000            | 5259200             | 12150000            | 8031600                    |
| 12     | Tegument protein UL47                | 13            | 59701000 | 95905000            | 48184000            | 74667000            | 82758000                   |
| 13     | Major DNA-binding protein            | 31            | 4.15E+08 | 4.22E+08            | 4.44E+08            | 3.27E+08            | 4.39E+08                   |
| 14     | Triplex capsid protein 1             | 22            | 76925000 | 80867000            | 49053000            | 85817000            | 74079000                   |
| 15     | Tegument protein UL46                | 14            | 8763400  | 11152000            | 8561200             | 12463000            | 9024200                    |
| 16     | Tegument protein VP16                | 12            | 25461000 | 29828000            | 24032000            | 32303000            | 33741000                   |
| 17     | mRNA export factor ICP27             | 5             | 65052000 | 45830000            | 48386000            | 41274000            | 62247000                   |
| 18     | Portal protein                       | 56            | 2174600  | 3901800             | 3018400             | 3896100             | 3299100                    |
| 19     | Capsid vertex component 1            | 45            | 10922000 | 15555000            | 9218600             | 13059000            | 11478000                   |
| 20     | Nuclear egress protein 1             | 29            | 21609000 | 15946000            | 11739000            | 12550000            | 16998000                   |
| 21     | Nuclear egress protein 2             | 26            | 60217000 | 96829000            | 64970000            | 82555000            | 70709000                   |
| 22     | Large tegument protein               | 24            | 30209000 | 38959000            | 22967000            | 26724000            | 31338000                   |
| 23     | Inner tegument protein               | 23            | 27162000 | 31615000            | 23699000            | 30601000            | 26773000                   |
| 24     | DNA polymerase processivity factor   | 18            | 1.32E+08 | 1.45E+08            | 1.33E+08            | 1.53E+08            | 1.22E+08                   |
| 25     | Tegument protein VP22                | 11            | 3E+08    | 1.05E+08            | 72235000            | 1.11E+08            | 77521000                   |
| 26     | DNA primase                          | 7             | 0        | 403560              | 0                   | 416120              | 445360                     |

|    |                                          |    |          |          |          |          |          |
|----|------------------------------------------|----|----------|----------|----------|----------|----------|
| 27 | Serine/threonine-<br>protein kinase UL13 | 49 | 1029400  | 1267500  | 0        | 992370   | 1066300  |
| 28 | Glycoprotein G                           | 70 | 7763200  | 10651000 | 6170100  | 5697000  | 5825100  |
| 29 | Cytoplasmic<br>envelopment<br>protein 2  | 46 | 5710100  | 6904300  | 5807900  | 5667900  | 5820700  |
| 30 | Tegument protein<br>UL21                 | 40 | 19523000 | 13215000 | 10426000 | 10602000 | 40850000 |
| 31 | ORF protein 2                            | 2  | 6509700  | 13405000 | 2613700  | 0        | 0        |
| 32 | Envelope protein<br>UL45                 | 15 | 3423900  | 6110500  | 2451900  | 4253500  | 4048600  |
| 33 | ORF protein 59                           | 59 | 12931000 | 10356000 | 10649000 | 10223000 | 10612000 |
| 34 | ORF protein 3                            | 3  | 5969100  | 8898100  | 7535900  | 3729600  | 0        |
| 35 | E3 ubiquitin-<br>protein ligase ICP0     | 63 | 10721000 | 11200000 | 9420800  | 12522000 | 15578000 |
| 36 | Thymidine kinase                         | 38 | 56063000 | 72649000 | 44132000 | 67118000 | 64495000 |
| 37 | Packaging protein<br>UL32                | 28 | 0        | 0        | 799790   | 0        | 1261800  |
| 38 | Glycoprotein I                           | 73 | 13318000 | 14348000 | 10520000 | 12638000 | 13165000 |
| 39 | Glycoprotein D                           | 72 | 11519000 | 17086000 | 0        | 9276600  | 9266900  |
| 40 | Glycoprotein H                           | 39 | 11487000 | 24548000 | 10290000 | 16199000 | 12927000 |
| 41 | Glycoprotein B                           | 33 | 1.2E+08  | 2.15E+08 | 74321000 | 1.46E+08 | 1.4E+08  |
| 42 | Tripartite terminase                     | 32 | 747020   | 797000   | 725740   | 813340   | 755250   |
| 43 | Internal repeat 6                        | 67 | 3.06E+08 | 6.6E+08  | 4.3E+08  | 5.31E+08 | 2.38E+08 |
| 44 | Glycoprotein C                           | 16 | 34061000 | 82703000 | 20409000 | 58136000 | 46296000 |
| 45 | Glycoprotein E                           | 74 | 7132200  | 13009000 | 7924400  | 8334700  | 8958100  |

**Supplementary Table S3:** LFQ intensity of each viral proteins detected in PBMC infected with Ab4-wt and mutant EHV-1 at 24 hpi.

| <b>Cytokine</b>                                                | <b>Cell source</b>                                                                        | <b>Targets</b>                                                                        | <b>Functions</b>                                                                                                                                                                    | <b>Reference</b> |
|----------------------------------------------------------------|-------------------------------------------------------------------------------------------|---------------------------------------------------------------------------------------|-------------------------------------------------------------------------------------------------------------------------------------------------------------------------------------|------------------|
| <b>G-CSF</b>                                                   | Monocytes, endothelial cells, fibroblasts                                                 | Stem cells in bone marrow                                                             | Granulocyte production                                                                                                                                                              | [1,2]            |
| <b>IL-1<math>\alpha</math> and IL-1<math>\beta</math></b>      | Macrophages, B cells and dendritic cells                                                  | T and B cells, NK cells                                                               | Proinflammatory proliferation and differentiation, pyrogenic                                                                                                                        | [3,4]            |
| <b>IL-2</b>                                                    | CD4 <sup>+</sup> and CD8 <sup>+</sup> activated T cells, dendritic cells, NK cells        | CD4 <sup>+</sup> and CD8 <sup>+</sup> T cells, B and NK cells                         | Proliferation of effector T and B cells, development of Treg cells, B and NK cells stimulation, proliferation and cytokine production in innate lymphoid cells                      | [5,6]            |
| <b>IL-6</b>                                                    | T and B cells, EC, monocytes, macrophages, granulocytes                                   | Leukocytes, T and B cells, haematopoietic cells                                       | Leukocyte trafficking and activation; T and B cell differentiation, activation and survival;                                                                                        | [7]              |
| <b>IL-8</b>                                                    | Monocytes, macrophages, neutrophils, lymphocytes, EC, fibroblasts                         | T cells, neutrophils, NK cells, monocytes, endothelial cells, eosinophils, mast cells | Chemoattractant for T cells, neutrophils, NK cells, basophils, eosinophils, mobilization of haematopoietic stem cells, angiogenesis                                                 | [8]              |
| <b>IL-10</b>                                                   | T and B cells, monocytes, macrophages and dendritic cells                                 | Macrophages, monocytes, T and B cells, NK cells, DC                                   | Immunosuppressive effect through antigen presenting cells,                                                                                                                          | [9]              |
| <b>TNF<math>\alpha</math></b>                                  | Activated macrophages, monocytes, CD <sup>+</sup> T cells, B cells, NK cells, neutrophils | Nucleated cells                                                                       | Host defense, dual role as proinflammatory and immunosuppressive mediator                                                                                                           | [10]             |
| <b>IFN<math>\gamma</math></b>                                  | Macrophages, cytotoxic T lymphocytes, B cells, NK cells                                   | Epithelial cells, macrophages, dendritic cells, NK cells, T and B cells               | Antiviral properties, promotion of cytotoxic activity, T <sub>H</sub> 1 differentiation, upregulation of MHC class I and II, inhibition of cell proliferation, proapoptotic effects | [11]             |
| <b>GRO (growth related oncogene) CXCL1</b>                     | Macrophages, neutrophils, epithelial cells                                                | Leukocytes                                                                            | Chemotaxis, inflammation, angiogenesis, tumor cell transformation, wound healing                                                                                                    | [12,13]          |
| <b>IP-10 (IFN<math>\gamma</math>-inducible protein) CXCL10</b> | T and B cells, monocytes, EC, neutrophils, epithelium                                     | Activated T and B cells, NK cells, dendritic cells, macrophages                       | Chemotaxis, proinflammatory, modulate angiogenesis and wound healing                                                                                                                | [14-16]          |

|             |                                                                             |                                          |                                                               |         |
|-------------|-----------------------------------------------------------------------------|------------------------------------------|---------------------------------------------------------------|---------|
| <b>FGF2</b> | Cells of inflammation and immunity, T cells, mononuclear phagocytes, and EC | Autocrine action, EC, variety of tissues | Inflammation, neovascularisation, angiogenesis, wound healing | [17-20] |
|-------------|-----------------------------------------------------------------------------|------------------------------------------|---------------------------------------------------------------|---------|

---

**Supplementary Table S4:** Overview of cytokine produced, their cell source, targets, and functions.

## References:

1. Akdis, M.; Aab, A.; Altunbulakli, C.; Azkur, K.; Costa, R.A.; Cramer, R.; Duan, S.; Eiwegger, T.; Eljaszewicz, A.; Ferstl, R., et al. Interleukins (from IL-1 to IL-38), interferons, transforming growth factor beta, and TNF-alpha: Receptors, functions, and roles in diseases. *The Journal of allergy and clinical immunology* **2016**, *138*, 984-1010, doi:10.1016/j.jaci.2016.06.033.
2. Basu, S.; Hodgson, G.; Katz, M.; Dunn, A.R. Evaluation of role of G-CSF in the production, survival, and release of neutrophils from bone marrow into circulation. *Blood* **2002**, *100*, 854-861, doi:10.1182/blood.v100.3.854.
3. Dinarello, C.A.; Renfer, L.; Wolff, S.M. Human leukocytic pyrogen: purification and development of a radioimmunoassay. *Proc Natl Acad Sci U S A* **1977**, *74*, 4624-4627, doi:10.1073/pnas.74.10.4624.
4. Garlanda, C.; Dinarello, C.A.; Mantovani, A. The interleukin-1 family: back to the future. *Immunity* **2013**, *39*, 1003-1018, doi:10.1016/j.immuni.2013.11.010.
5. Morgan, D.A.; Ruscetti, F.W.; Gallo, R. Selective in vitro growth of T lymphocytes from normal human bone marrows. *Science* **1976**, *193*, 1007-1008, doi:10.1126/science.181845.
6. Roediger, B.; Kyle, R.; Tay, S.S.; Mitchell, A.J.; Bolton, H.A.; Guy, T.V.; Tan, S.Y.; Forbes-Blom, E.; Tong, P.L.; Koller, Y., et al. IL-2 is a critical regulator of group 2 innate lymphoid cell function during pulmonary inflammation. *The Journal of allergy and clinical immunology* **2015**, *136*, 1653-1663 e1657, doi:10.1016/j.jaci.2015.03.043.
7. Uyttenhove, C.; Coullie, P.G.; Van Snick, J. T cell growth and differentiation induced by interleukin-HP1/IL-6, the murine hybridoma/plasmacytoma growth factor. *J Exp Med* **1988**, *167*, 1417-1427, doi:10.1084/jem.167.4.1417.
8. Coelho, A.L.; Hogaboam, C.M.; Kunkel, S.L. Chemokines provide the sustained inflammatory bridge between innate and acquired immunity. *Cytokine Growth Factor Rev* **2005**, *16*, 553-560, doi:10.1016/j.cytogfr.2005.03.004.
9. Stanic, B.; van de Veen, W.; Wirz, O.F.; Ruckert, B.; Morita, H.; Sollner, S.; Akdis, C.A.; Akdis, M. IL-10-overexpressing B cells regulate innate and adaptive immune responses. *The Journal of allergy and clinical immunology* **2015**, *135*, 771-780 e778, doi:10.1016/j.jaci.2014.07.041.
10. Brown, S.D.; Brown, L.A.; Stephenson, S.; Dodds, J.C.; Douglas, S.L.; Qu, H.; Fitzpatrick, A.M. Characterization of a high TNF-alpha phenotype in children with moderate-to-severe asthma. *The Journal of allergy and clinical immunology* **2015**, *135*, 1651-1654, doi:10.1016/j.jaci.2014.08.054.
11. Akkoc, T.; de Koning, P.J.; Ruckert, B.; Barlan, I.; Akdis, M.; Akdis, C.A. Increased activation-induced cell death of high IFN-gamma-producing T(H)1 cells as a mechanism of T(H)2 predominance in atopic diseases. *The Journal of allergy and clinical immunology* **2008**, *121*, 652-658 e651, doi:10.1016/j.jaci.2007.12.1171.
12. Bhat, K.; Sarkissyan, M.; Wu, Y.; Vadgama, J.V. GROalpha overexpression drives cell migration and invasion in triple negative breast cancer cells. *Oncology reports* **2017**, *38*, 21-30, doi:10.3892/or.2017.5668.
13. Fujiwara, K.; Matsukawa, A.; Ohkawara, S.; Takagi, K.; Yoshinaga, M. Functional distinction between CXC chemokines, interleukin-8 (IL-8), and growth related oncogene (GRO)alpha in neutrophil infiltration. *Lab Invest* **2002**, *82*, 15-23.
14. Neville, L.F.; Mathiak, G.; Bagasra, O. The immunobiology of interferon-gamma inducible protein 10 kD (IP-10): a novel, pleiotropic member of the C-X-C chemokine superfamily. *Cytokine Growth Factor Rev* **1997**, *8*, 207-219.
15. Liu, M.; Guo, S.; Hibbert, J.M.; Jain, V.; Singh, N.; Wilson, N.O.; Stiles, J.K. CXCL10/IP-10 in infectious diseases pathogenesis and potential therapeutic implications. *Cytokine Growth Factor Rev* **2011**, *22*, 121-130, doi:10.1016/j.cytogfr.2011.06.001.

16. Liu, M.; Guo, S.; Stiles, J.K. The emerging role of CXCL10 in cancer (Review). *Oncol Lett* **2011**, *2*, 583-589, doi:10.3892/ol.2011.300.
17. Rusnati, M.; Camozzi, M.; Moroni, E.; Bottazzi, B.; Peri, G.; Indraccolo, S.; Amadori, A.; Mantovani, A.; Presta, M. Selective recognition of fibroblast growth factor-2 by the long pentraxin PTX3 inhibits angiogenesis. *Blood* **2004**, *104*, 92-99, doi:10.1182/blood-2003-10-3433.
18. Delrieu, I. The high molecular weight isoforms of basic fibroblast growth factor (FGF-2): an insight into an intracrine mechanism. *FEBS letters* **2000**, *468*, 6-10, doi:10.1016/s0014-5793(00)01189-3.
19. Yun, Y.R.; Won, J.E.; Jeon, E.; Lee, S.; Kang, W.; Jo, H.; Jang, J.H.; Shin, U.S.; Kim, H.W. Fibroblast growth factors: biology, function, and application for tissue regeneration. *J Tissue Eng* **2010**, *2010*, 218142, doi:10.4061/2010/218142.
20. Seghezzi, G.; Patel, S.; Ren, C.J.; Gualandris, A.; Pintucci, G.; Robbins, E.S.; Shapiro, R.L.; Galloway, A.C.; Rifkin, D.B.; Mignatti, P. Fibroblast growth factor-2 (FGF-2) induces vascular endothelial growth factor (VEGF) expression in the endothelial cells of forming capillaries: an autocrine mechanism contributing to angiogenesis. *J Cell Biol* **1998**, *141*, 1659-1673, doi:10.1083/jcb.141.7.1659.
